# Supplementary material
Source: PubMed Central journal article supplement (PMC5722226)
Supplement: NIHMS905443-supplement-supplement_1.pdf [file NIHMS905443-supplement-supplement_1.pdf]

**Supplementary Table 1. Assessments included in the PARS study(10,11,12)**

| <b>Category</b>          | <b>Area assessed</b>                     | <b>Assessments</b>                                                                                                                                                                                                                                                                                                                                                                                                                                                                                                                                                |
|--------------------------|------------------------------------------|-------------------------------------------------------------------------------------------------------------------------------------------------------------------------------------------------------------------------------------------------------------------------------------------------------------------------------------------------------------------------------------------------------------------------------------------------------------------------------------------------------------------------------------------------------------------|
| <b>Olfaction</b>         | <b>Odor identification</b>               | 40-item University of Pennsylvania Smell Identification Test(21). Subjects scoring $\leq 15^{\text{th}}$ percentile based on age and sex (based on study-specific norms, as described(11)) were classified as hyposmic; all others were considered normosmic.                                                                                                                                                                                                                                                                                                     |
| <b>Imaging</b>           | <b>Dopamine transporter binding</b>      | $[^{123}\text{I}]\beta\text{-CIT}$ single photon emission computed tomography (SPECT) was performed as previously described(12,22). Baseline age-adjusted percent FP-CIT lowest putamen:cerebellum binding ratio was calculated. Scans were categorized as DAT reduction ( $\leq 80\%$ age-expected lowest putamen $[^{123}\text{I}]\beta\text{-CIT}$ uptake) or no DAT reduction ( $>80\%$ age-expected lowest putamen $[^{123}\text{I}]\beta\text{-CIT}$ uptake)(23). This cutoff was chosen in order to maximize detection of potentially at-risk individuals. |
| <b>PD signs/symptoms</b> | <b>Motor function</b>                    | Unified PD Rating Scale (UPDRS)                                                                                                                                                                                                                                                                                                                                                                                                                                                                                                                                   |
| <b>Cognition</b>         | <b>Memory</b>                            | (i) Hopkins Verbal Learning Test-Revised (immediate and delayed recall and recognition)(24)<br>(ii) Repeatable Battery for Assessment of Neuropsychological Status (RBANS Battery A, immediate and delayed recall of the “fire story” and the “tidal wave story” and figure recall)(25)<br>(iii) Wechsler Memory Scale (WMS-III) logical memory story A, immediate and delayed recall(26)                                                                                                                                                                         |
|                          | <b>Executive function/Working memory</b> | (i) Controlled Oral Word Association Test (phonemic fluency: total word generation for letters F, A, and S and semantic fluency: total word generation for male names, animal, fruit, and vegetable categories)(27)<br>(ii) Trail Making Test Part B (time to complete)(28)<br>(iii) Wechsler Adult Intelligence Scale (WAIS)-III digit span backwards(26)                                                                                                                                                                                                        |
|                          | <b>Processing speed/Attention</b>        | (i) WAIS-III Digit Symbol Coding (raw score)<br>(ii) WAIS-III symbol search (raw score)<br>(iii) WAIS-III digit span forward(26)<br>(iv) Trail Making Test Part A (time to complete)(28)                                                                                                                                                                                                                                                                                                                                                                          |
|                          | <b>Visuospatial function</b>             | (i) RBANS Battery A figure copying and line orientation(25)<br>(ii) Clock Drawing Test<br>(iii) Visual Object and Space Perception Battery (silhouettes animals and silhouettes objects)(29)                                                                                                                                                                                                                                                                                                                                                                      |
|                          | <b>Language</b>                          | (i) Boston Naming Test (split half and split half even raw scores)(30)                                                                                                                                                                                                                                                                                                                                                                                                                                                                                            |
| <b>Mood</b>              | <b>Depressive symptoms</b>               | The Center for Epidemiological Studies Depression Scale (CES-D)(13). Subjects scoring $\geq 16$ at baseline were classified as having clinically significant depression, consistent with previous PARS research(11).                                                                                                                                                                                                                                                                                                                                              |

**Supplementary Table 2. Demographics and clinical features at first assessment for hyposmic participants (N=136)<sup>a</sup>**

| <b>Variable</b>                          | <b>Value</b>              |
|------------------------------------------|---------------------------|
| Mean age (SD; range)                     | 67.1 (7.0; 49.8 – 82.9)   |
| Male sex (N, %)                          | 84 (62%)                  |
| Mean education in years (SD; range)      | 15.9 (2.5; 9.0 – 20.0)    |
| ≥ 1 family member with PD (N, %)         | 47 (35%)                  |
| Smoking history, current or past (N, %)  | 69 (52%)                  |
| Mean Total UPDRS (SD; range)             | 2.5 (2.9; 0 – 16)         |
| Mean % age-expected putamen (SD; range)  | 93.6 (22.6; 35.1 – 161.3) |
| Clinically significant depression (N, %) | 16 (12%)                  |

<sup>a</sup>This group includes PARS participants who had at least 1 cognitive assessment, with the baseline cognitive assessment occurring before the second imaging visit.

**Supplementary Table 3. Association between baseline cognition and conversion to PD in hyposmics**

| Cognitive measure                   | Clinical outcome <sup>a</sup> |                    | p-value <sup>b</sup> | Odds ratios (95% CI) <sup>c</sup> |
|-------------------------------------|-------------------------------|--------------------|----------------------|-----------------------------------|
|                                     | No conversion (N = 126)       | Conversion (N = 8) |                      |                                   |
| Global cognition                    | -0.14 (1.03)                  | -0.78 (0.45)       | 0.07                 | 2.55 (0.92, 7.09)                 |
| Executive function / Working memory | -0.14 (0.97)                  | -0.82 (0.37)       | 0.06                 | 2.71 (0.97, 7.57)                 |
| Language                            | -0.07 (1.01)                  | 0.21 (0.95)        | 0.63                 | 0.78 (0.29, 2.10)                 |
| Memory                              | -0.08 (1.04)                  | -0.59 (0.62)       | 0.26                 | 1.64 (0.70, 3.84)                 |
| Processing speed / Attention        | -0.14 (1.05)                  | -0.61 (0.67)       | 0.25                 | 1.69 (0.69, 4.16)                 |
| Visuospatial                        | -0.08 (1.07)                  | -0.36 (1.07)       | 0.35                 | 1.42 (0.68, 2.96)                 |

<sup>a</sup> Baseline mean (SD) cognitive z-scores by conversion status. Higher scores indicate better performance.

<sup>b</sup> Significance level for association between baseline cognitive performance and conversion from separate logistic regression models adjusted for age at baseline cognitive testing, sex, depression and education.

<sup>c</sup> Odds ratios are signed so that an odds ratio >1 implies a greater risk of conversion.

**Supplementary Table 4. Association between baseline olfaction and annualized changes in cognitive measures**

| Cognitive measure <sup>a</sup>         | Olfactory status    |                      | Entire sample<br>(N=198)<br>p-value <sup>b</sup> |
|----------------------------------------|---------------------|----------------------|--------------------------------------------------|
|                                        | Normosmic<br>(N=73) | Hyposmic<br>(N=125)  |                                                  |
| Global cognition                       | -0.02 (-0.08, 0.03) | -0.07 (-0.11, -0.03) | 0.08                                             |
| Executive function /<br>Working memory | -0.03 (-0.09, 0.03) | -0.05 (-0.10, 0.00)  | 0.51                                             |
| Language <sup>c</sup>                  | 0.01 (-0.09, 0.11)  | -0.13 (-0.22, -0.05) | 0.005                                            |
| Memory                                 | -0.00 (-0.07, 0.07) | -0.09 (-0.15, -0.03) | 0.01                                             |
| Processing speed /<br>Attention        | -0.01 (-0.07, 0.04) | 0.01 (-0.04, 0.06)   | 0.45                                             |
| Visuospatial                           | 0.01 (-0.07, 0.09)  | -0.04 (-0.11, 0.03)  | 0.23                                             |

<sup>a</sup> Adjusted mean (95% CI) cognitive changes by baseline olfactory status.

<sup>b</sup> Significance of baseline olfactory status on change in cognition from separate multiple regression models adjusted for age at baseline cognitive testing, sex, depression, education, and baseline cognitive measure.

<sup>c</sup> One outlier omitted.
